# Supplementary material for: Remote care instruction via the WeChat platform for female patients receiving subcutaneous anticoagulation during the COVID-19 pandemic: a retrospective analysis
Source: PeerJ. 2024 Oct 24;12:e18337. doi: 10.7717/peerj.18337 (PMC11512807; doi:10.7717/peerj.18337)
Supplement: Supplemental Information 1 [file peerj-12-18337-s001.xlsx]

## Sheet: Sheet1
number	gender	age	Days of hospitalization	ACTS-0	ACTS-1m	ACTS-3m	BREF-0	BREF-1m	BREF-3m
1	femal	33	7	48	53	55	55	61	62
2	femal	32	11	47	54	54	54	58	61
3	femal	38	4	49	54	55	55	59	60
4	femal	34	1	48	53	54	53	59	61
5	femal	27	2	50	57	57	57	61	63
6	femal	25	8	51	55	56	56	60	62
7	femal	27	4	47	55	55	55	62	63
8	femal	44	3	45	50	52	51	55	56
9	femal	30	10	48	53	54	52	58	59
10	femal	34	2	47	55	56	53	59	62
11	femal	32	3	47	57	58	52	56	58
12	femal	34	17	50	58	57	56	62	63
13	femal	38	15	49	53	54	55	61	62
14	femal	27	14	47	55	56	55	60	61
15	femal	37	14	48	52	53	54	61	63
16	femal	36	4	46	53	55	51	57	60
17	femal	38	3	45	51	53	52	56	59
18	femal	31	5	51	58	58	57	63	64
19	femal	35	2	48	52	52	54	60	63
20	femal	35	4	47	50	51	52	56	59
21	femal	21	9	52	58	58	58	63	66
22	femal	25	5	45	52	53	52	58	61
23	femal	25	11	46	55	55	55	60	62
24	femal	21	6	50	57	58	57	61	64
25	femal	27	7	49	55	55	56	62	63
26	femal	39	6	45	52	52	52	58	60
27	femal	46	5	44	53	54	51	57	60
28	femal	36	6	49	53	54	55	61	62
29	femal	31	2	45	55	56	54	60	63
30	femal	34	2	48	56	57	55	61	62
31	femal	32	2	47	54	55	56	60	59
32	femal	27	11	49	53	54	55	61	62
33	femal	29	2	48	55	56	56	62	63
34	femal	27	3	45	50	52	54	58	61
35	femal	28	4	50	57	58	58	62	63
36	femal	31	5	49	55	55	56	63	65
37	femal	34	5	48	56	56	55	60	64
38	femal	27	3	48	55	56	55	61	62
39	femal	28	4	47	53	54	56	59	63
40	femal	33	8	50	55	56	58	64	63
41	femal	34	5	51	58	59	60	66	66
42	femal	37	5	48	53	55	55	61	62
43	femal	32	5	49	55	54	58	65	66
44	femal	30	3	48	54	55	54	60	60
45	femal	29	3	47	52	53	56	62	63
46	femal	32	3	45	51	54	54	60	61
47	femal	30	5	48	52	53	55	61	62
48	femal	30	11	49	55	50	56	60	63
49	femal	33	5	47	54	55	56	62	61
50	femal	29	3	48	53	55	55	61	63
51	femal	26	5	51	58	54	58	62	64
52	femal	33	6	48	55	56	56	60	61
53	femal	27	5	45	51	54	54	59	63
54	femal	34	7	46	54	56	55	61	64
55	femal	24	8	49	54	55	59	65	66
56	femal	29	3	48	55	56	55	63	65
57	femal	29	5	47	54	54	54	60	61
58	femal	30	5	47	55	56	56	62	60
59	femal	37	10	47	53	54	55	60	61
60	femal	25	6	45	51	53	52	58	58
61	femal	35	2	50	58	52	58	63	57
62	femal	32	5	49	57	58	58	64	63
63	femal	32	3	48	55	55	56	62	63
64	femal	26	4	49	57	56	56	61	62
65	femal	33	5	48	57	57	55	61	63
66	femal	27	5	46	53	55	54	60	61
67	femal	29	5	47	54	53	55	59	62
68	femal	35	3	45	53	54	54	56	59
69	femal	31	5	48	53	55	57	62	63
70	femal	26	15	47	52	53	56	57	60
71	femal	33	3	49	52	55	55	58	61
72	femal	34	6	48	54	55	54	60	62
73	femal	31	5	50	55	56	60	66	66
74	femal	32	5	48	52	53	58	60	62
75	femal	27	5	51	59	60	59	65	66
76	femal	29	5	49	55	54	57	63	63
77	femal	27	4	50	57	58	56	59	61
78	femal	29	7	50	55	56	56	61	62
79	femal	31	4	49	56	57	54	58	61
80	femal	32	5	47	53	54	54	57	90
81	femal	21	5	49	54	55	56	61	62
82	femal	32	4	48	55	57	55	59	62
83	femal	37	6	47	53	54	56	62	63
84	femal	28	3	49	55	56	58	62	64
85	femal	32	5	47	54	55	54	59	62
86	femal	37	4	45	55	56	52	55	59
87	femal	29	7	48	54	55	55	59	60
88	femal	31	7	48	53	55	56	61	62
89	femal	29	2	50	57	57	57	63	64
90	femal	34	6	51	56	58	56	62	63
91	femal	33	5	47	55	54	58	63	61
92	femal	29	3	48	54	55	55	59	63
93	femal	27	6	49	53	55	56	61	62
94	femal	23	4	48	54	54	57	63	64
95	femal	27	6	48	55	57	56	62	63
96	femal	39	3	48	56	58	55	61	64
97	femal	30	5	49	55	56	57	63	64
98	femal	27	9	45	54	55	54	58	60
99	femal	34	6	46	52	54	54	59	63
100	femal	26	5	48	54	55	55	59	63
101	femal	37	2	47	53	55	56	60	64
102	femal	36	5	45	52	53	52	58	62
103	femal	33	4	48	51	53	54	58	60
104	femal	30	5	48	57	58	55	59	62
105	femal	38	4	47	55	57	54	59	60
106	femal	31	12	48	54	55	55	61	62
107	femal	34	9	46	51	53	53	57	58
108	femal	33	5	49	53	54	55	60	62
109	femal	30	6	50	57	56	57	62	62
110	femal	33	4	47	55	56	56	62	63
111	femal	26	2	45	54	55	52	55	56
112	femal	27	5	48	52	53	55	61	60
113	femal	28	2	46	51	53	54	60	61
114	femal	39	5	44	54	55	53	59	61
115	femal	29	5	48	53	54	55	60	62
116	femal	30	4	47	51	53	56	62	63
117	femal	32	4	49	57	54	58	64	65
118	femal	34	10	48	54	55	56	60	62
119	femal	32	2	47	56	57	55	61	61
120	femal	24	15	45	51	53	54	58	60
121	femal	35	6	48	52	54	55	59	63
122	femal	30	4	49	54	56	56	60	63
123	femal	26	8	50	56	57	57	62	62
124	femal	20	7	49	55	55	58	63	64
125	femal	24	2	48	56	57	56	62	63
126	femal	31	4	47	54	56	54	58	60
